1 **Title:** A Biological Signature for the Inhibition of Outer Membrane Lipoprotein

2 Biogenesis

3

4 **Authors:** Kelly M. Lehman<sup>1,2,3,4</sup>, Hannah C. Smith<sup>1,2,3,4</sup>, and Marcin Grabowicz<sup>2,3,4\*</sup>

5

6 **Affiliations:**

- 7 1. Microbiology and Molecular Genetics Program, Graduate Division of Biological  
8 and Biomedical Sciences, Laney Graduate School, Emory University, Atlanta,  
9 GA, USA
- 10 2. Department of Microbiology & Immunology, Emory University School of  
11 Medicine, Atlanta, GA, USA
- 12 3. Division of Infectious Diseases, Department of Medicine, Emory University  
13 School of Medicine, Atlanta, GA, USA
- 14 4. Emory Antibiotic Resistance Center, Emory University School of Medicine,  
15 Atlanta, GA, USA

16  
17

18 **\*Corresponding Author:** [marcin.grabowicz@emory.edu](mailto:marcin.grabowicz@emory.edu)

19

20 **ABSTRACT**

21 The outer membrane (OM) of Gram-negative bacteria is an essential organelle that acts  
22 as a formidable barrier to antibiotics. Increasingly prevalent resistance to existing drugs  
23 has exacerbated the need for antibiotic discovery efforts targeting the OM. Acylated  
24 proteins, known as lipoproteins, are essential in every pathway needed to build the OM.  
25 The central role of OM lipoproteins makes their biogenesis a uniquely attractive  
26 therapeutic target, but it also complicates *in vivo* identification of on-pathway inhibitors,  
27 as inhibition of OM lipoprotein biogenesis broadly disrupts OM assembly. Here, we use  
28 genetics to probe the eight essential proteins involved in OM lipoprotein biogenesis. We  
29 define a biological signature consisting of three simple assays that can characteristically  
30 identify OM lipoprotein biogenesis defects *in vivo*. The few known chemical inhibitors of  
31 OM lipoprotein biogenesis conform to the biological signature. We also examine  
32 MAC13243, a proposed inhibitor of OM lipoprotein biogenesis, and find that it fails to  
33 conform to the biological signature. Indeed, we demonstrate that MAC13243 activity  
34 relies entirely on a target outside of the OM lipoprotein biogenesis pathway. Hence, our  
35 signature offers simple tools to easily assess whether antibiotic lead compounds target  
36 an essential pathway that is the hub of OM assembly.

37

38 **IMPORTANCE**

39 Gram-negative bacteria have an outer membrane, which acts as a protective barrier  
40 and excludes many antibiotics. The limited number of antibiotics active against Gram-  
41 negative bacteria, along with rising rates of antibiotic resistance, highlights the need for  
42 efficient antibiotic discovery efforts. Unfortunately, finding the target of lead compounds,

43 especially ones targeting outer membrane construction, remains difficult. The hub of  
44 outer membrane construction is the lipoprotein biogenesis pathway. We show that  
45 defects in this pathway result in a signature cellular response that can be used to  
46 quickly and accurately validate pathway inhibitors. Indeed, we found that MAC13243, a  
47 compound previously proposed to target outer membrane lipoprotein biogenesis, does  
48 not fit the signature, and we show that it instead targets an entirely different cellular  
49 pathway. Our findings offer a streamlined approach to discovery and validation of lead  
50 antibiotics against a conserved and essential pathway in Gram-negative bacteria.

51

## 52 **INTRODUCTION**

53 Since the advent of antibiotics, treatment of infection has been a race against  
54 time. Once antibiotics are introduced clinically, bacteria often quickly develop  
55 resistance. Antibiotic discovery efforts, with an emphasis on novel bacterial targets, are  
56 essential to the continuation of the current medical treatment model for curing  
57 infections. Resistance among Gram-negative pathogens is particularly concerning, as  
58 discovery of novel antibiotic classes targeting these bacteria has proved especially  
59 difficult (1). Gram-negative bacteria, such as *Escherichia coli*, have an outer membrane  
60 (OM) that acts as a selective permeability barrier against extracellular onslaughts, such  
61 as host immune factors and antibiotics (2). Thus, the OM is a prime antibiotic target,  
62 both because it is essential and because it is a protective barrier, leading many recent  
63 antibiotic discovery efforts to focus on OM biogenesis (3, 4).

64 The OM is an asymmetric lipid bilayer. The inner leaflet consists of  
65 phospholipids, while the outer leaflet primarily consists of lipopolysaccharide (LPS) (5).

66 Construction of the OM requires specialized machinery, particularly because highly  
67 hydrophobic proteins and lipids must, somehow, cross an aqueous periplasm (Fig. 1)  
68 (6). Three machines are largely responsible for OM biogenesis: the lipopolysaccharide  
69 transport (Lpt) machine shuttles LPS to the OM (7), the  $\beta$ -barrel assembly machine  
70 (Bam) folds  $\beta$ -barrel proteins into the OM (8), and the localization of lipoprotein (Lol)  
71 pathway traffics lipoproteins to the OM (9). Notably, Bam, Lpt, and Lol require at least  
72 one essential OM lipoprotein component: BamD, LptE, and LolB, respectively (10–12).  
73 Thus, OM lipoprotein biogenesis, comprised of the lipoprotein maturation and trafficking  
74 pathways, is key to construction and integrity of the OM.

75 All lipoproteins are synthesized in the cytoplasm and secreted. Lipoproteins  
76 destined for the OM must undergo a series of sequential modifications in the inner  
77 membrane (IM) before they are trafficked to the OM (Fig. 1) (13, 14). First, the enzyme  
78 Lgt transfers a diacylglycerol moiety from phosphatidylglycerol to an invariant cysteine  
79 of a target lipoprotein (15, 16). Next, the type II signal peptidase LspA cleaves the signal  
80 peptide (17). Finally, the acyltransferase Lnt adds a third acyl chain from  
81 phosphatidylethanolamine to the now N-terminal cysteine, producing a mature  
82 lipoprotein (18, 19). Lipoprotein maturation enzymes are highly conserved and essential  
83 among Gram-negative bacteria. However, some species can remain viable without *Lnt* in  
84 laboratory conditions (20, 21).

85 A mature lipoprotein is trafficked to the OM if it contains residues specifying an  
86 OM localization signal, which varies across species (22–24). An ATP-binding cassette  
87 (ABC) transporter (LolCDE in *E. coli*) extracts mature, OM-targeted lipoproteins from the  
88 IM (25). Then, the chaperone LolA receives lipoproteins from LolC, shielding their

89 hydrophobic acyl chains from the aqueous periplasm (26, 27). Finally, the OM  
90 lipoprotein LolB receives lipoproteins from LolA and inserts them into the OM (26).  
91 Many clinically important species produce LolB, although some Gram-negative species  
92 lack a clear homolog (9). A LolAB-independent trafficking mechanism also exists,  
93 though it alone cannot support viability in wildtype *E. coli* (28).

94 As OM assembly relies on lipoproteins, OM lipoprotein biogenesis is a crucial  
95 target for novel antibacterials. This pathway requires up to eight essential and  
96 conserved proteins, offering an array of potential therapeutic targets. In fact, a recent  
97 CRISPRi screen of the essential genes of *Vibrio cholerae* found that depletion of genes  
98 in the Lol trafficking pathway caused a more severe decrease in viability than any other  
99 essential genes (29).

100 Lipoproteins play an essential role in OM assembly, complicating unambiguous  
101 identification of OM lipoprotein biogenesis inhibitors *in vivo*. Inhibitors of OM lipoprotein  
102 biogenesis will wreak widespread havoc on  $\beta$ -barrel assembly, LPS transport, and cell  
103 wall biosynthesis. Lipoprotein trafficking and OM biogenesis are so entwined that  
104 lipoprotein trafficking inhibitors have emerged from screens designed to identify  
105 inhibitors of cell wall synthesis (30) and activators of  $\sigma^E$ , a monitor of  $\beta$ -barrel assembly  
106 (31).

107 *In vivo* target validation of new compounds active against essential pathways  
108 remains challenging. No protocol to validate inhibition of lipoprotein maturation or  
109 trafficking factors exists. In this work, we define a unique biological signature for target  
110 validation of OM lipoprotein biogenesis inhibitors in *E. coli*. Our signature consists of  
111 three biological effects that, collectively, are hallmarks of defective OM lipoprotein

112 biogenesis: (i) increased OM permeability, (ii) toxicity of the major OM lipoprotein Lpp,  
113 and (iii) activation of the Cpx envelope stress response by a sensory OM lipoprotein,  
114 NlpE. We validate this signature using genetic depletions and chemical inhibitors  
115 (compound 2, globomycin) of essential steps in OM lipoprotein biogenesis. We then  
116 demonstrate the utility of our signature by examining MAC13243, a proposed LolA  
117 inhibitor, and find that MAC13243 fails to fulfill our biological signature. Finally, using  
118 genetics, we confirm that MAC13243 bioactivity is independent of LolA.

119

## 120 **RESULTS**

121 **Depletion of OM lipoprotein biogenesis factors causes OM permeability.** To  
122 establish a biological signature of lipoprotein maturation or trafficking inhibition, we used  
123 our current understanding of OM assembly to develop assays that report on OM  
124 lipoprotein biogenesis defects. Since at least one lipoprotein is essential to each OM  
125 biogenesis machine, we hypothesized that disrupting OM lipoprotein biogenesis would  
126 cause OM assembly defects that affect its antibiotic barrier function.

127 To assess OM barrier integrity when OM lipoprotein biogenesis is limited, we  
128 used a series of *E. coli* strains in which expression of OM lipoprotein biogenesis genes  
129 (*lspA*, *lolCDE*, *lolA*, *lolB*) depends on arabinose induction. Growth in media lacking  
130 arabinose depletes these essential proteins. We used checkerboard assays to measure  
131 sensitivity to three large scaffold antibiotics, which cannot pass through an intact OM, in  
132 response to depletion of OM lipoprotein biogenesis factors. Each antibiotic had a  
133 distinct target: novobiocin (a hydrophobic DNA gyrase inhibitor, Fig. 2), vancomycin (a

134 hydrophilic cell wall biosynthesis inhibitor, Fig. 2), and rifampicin (a hydrophobic RNA  
135 polymerase inhibitor, Fig. S1).

136 As we depleted each protein, sensitivity to large scaffold antibiotics increased  
137 (Fig. 2 and Fig. S1). We observed variation in the extent of antibiotic sensitivity caused  
138 by depletion of each OM lipoprotein biogenesis factor, likely reflecting differing levels of  
139 depletion achievable with each construct. Nonetheless, depleting OM lipoprotein  
140 biogenesis increased OM permeability to antibiotics. The permeabilizing effect was  
141 compound-specific, as decreasing induction of *LspA*, *LolCDE*, *LolA*, or *LolB* did not  
142 sensitize cells to erythromycin (a hydrophobic macrolide inhibitor of translation, Fig. S1).  
143 Selective permeability caused by OM assembly mutants was previously observed and  
144 remains poorly understood (32). Our data confirm that defects in OM lipoprotein  
145 biogenesis weaken the integrity of the OM barrier.

146

147 **Loss of Lpp alleviates OM lipoprotein biogenesis defects.** In addition to disrupting  
148 OM construction, OM lipoprotein biogenesis defects cause IM mislocalization of OM-  
149 targeted lipoproteins, which can be toxic (28). One such example is the OM lipoprotein  
150 Lpp, which covalently crosslinks to the cell wall from the OM, providing important  
151 architectural stability to the cell envelope (33–35). When Lpp is not trafficked efficiently,  
152 it accumulates in the IM and errantly crosslinks to peptidoglycan. Lpp crosslinking from  
153 the IM is lethal (36). Hence, although *lpp* is not essential, efficient OM lipoprotein  
154 biogenesis of Lpp is essential. We reasoned that  $\Delta lpp$  would prevent toxicity, increasing  
155 viability when OM lipoprotein biogenesis is limited. We assessed the viability of Lgt,  
156 LspA, Lnt, LolCDE, LolA, or LolB depleted strains in the presence or absence of *lpp*

157 using arabinose-inducible constructs (Fig. 3). Each gene is essential in both *lpp*<sup>+</sup> and  
158  $\Delta$ *lpp* backgrounds; therefore, inducer-independent growth in these strains relies on  
159 leaky expression of the gene construct.

160 Depletion of any OM lipoprotein biogenesis factor severely reduced viability of  
161 wildtype *E. coli*, as expected for essential genes. In all instances,  $\Delta$ *lpp* improved viability  
162 without inducer. While  $\Delta$ *lpp* caused striking increases in viability in Lgt-, Lnt-, LolA-, and  
163 LolB-depleted cells, we measured only modest increases in viability in LspA- and  
164 LolCDE-depleted cells. The variation in the alleviation of toxicity in  $\Delta$ *lpp* strains likely  
165 reflects the dissimilar levels of depletion achievable with each gene construct, with little  
166 leaky expression of LspA or LolCDE. In fact, the tight regulation of the LspA depletion  
167 strain was previously demonstrated (37). Importantly,  $\Delta$ *lpp* did not improve viability  
168 when essential components of the Bam and Lpt machines (BamD and LptE) were  
169 depleted (Fig. S2). Therefore,  $\Delta$ *lpp* does not alleviate cell envelope defects in other  
170 essential OM assembly pathways. Rather, our data show that  $\Delta$ *lpp* specifically improves  
171 the viability of cells when OM lipoprotein biogenesis is depleted.

172

### 173 **Depletion of OM lipoprotein biogenesis causes NlpE-dependent activation of Cpx.**

174 A series of stress responses monitor OM and cell envelope integrity (38). Among these  
175 is Cpx, a two-component system comprised of the histidine kinase CpxA and the  
176 response regulator CpxR (39). Together, CpxAR respond to OM perturbations and  
177 various other cellular signals (40). Cpx was recently shown to alleviate stress caused by  
178 defects in late steps of lipoprotein trafficking (28, 41, 42). We hypothesized that



179 defective OM lipoprotein biogenesis would similarly activate Cpx, marking a signature of  
180 OM lipoprotein biogenesis stress.

181 To assess Cpx activation when OM lipoprotein biogenesis is defective, we used  
182 a reporter plasmid carrying a transcriptional *gfp* fusion to the promoter of the CpxAR-  
183 regulated gene *cpxP* ( $P_{cpxP}$ -*gfp*). The plasmid was introduced into the LspA, LolCDE,  
184 LolA, and LolB depletion strains. We monitored GFP fluorescence as each OM  
185 lipoprotein biogenesis factor was depleted during sub-culture without inducer (Fig. 4).  
186 As expected, depletion of each OM lipoprotein biogenesis factor reduced growth. As  
187 growth slowed, we detected strong increases in fluorescence from  $P_{cpxP}$ -*gfp* (Fig. 4),  
188 indicating activation of Cpx.

189 As a variety of stimuli activates Cpx, we wanted to test whether the observed  
190 rapid and potent Cpx activation was specific to OM lipoprotein biogenesis defects.  
191 Recent work proposed that Cpx activation in response to defects in late OM lipoprotein  
192 biogenesis is due to mislocalization of the OM sensor lipoprotein NlpE to the IM (41,  
193 42). We reasoned that if the observed Cpx activation was caused by sensing OM  
194 lipoprotein biogenesis defects, the early, strong Cpx activation would be NlpE-  
195 dependent. Hence, we deleted *nlpE* from our depletion strains and monitored  
196 expression from  $P_{cpxP}$ -*gfp*. Growth of all strains was similar in the presence and absence  
197 of *nlpE*. Importantly, deletion of *nlpE* decreased fluorescence upon depletion of LolCDE,  
198 LolA, or LolB, indicating NlpE-dependent Cpx activation. We did not observe clear NlpE-  
199 dependent Cpx activation in the LspA strain, likely a product of the construct's tight  
200 repression. However, as depletion of LolCDE, LolA, or LolB causes NlpE-dependent

201 Cpx activation, we conclude that this is a strong indicator of OM lipoprotein biogenesis  
202 limitation.

203

204 **Stress responses with OM lipoprotein sensors are activated by limited OM**

205 **lipoprotein biogenesis.** Two other envelope stress responses monitor OM defects:

206 Rcs and  $\sigma^E$ . Rcs monitors defects through the OM lipoprotein RcsF (43), while  $\sigma^E$

207 directly detects misfolded  $\beta$ -barrel proteins. We reasoned that OM lipoprotein

208 biogenesis defects would lead to early activation of Rcs but would not activate  $\sigma^E$ , as no

209 lipoprotein is involved in the  $\sigma^E$  response. To assess Rcs and  $\sigma^E$  activation, we

210 introduced reporter plasmids carrying a transcriptional *gfp* fusion to the Rcs-responsive

211 *osmB* promoter ( $P_{osmB-gfp}$ ) or the  $\sigma^E$ -dependent *micA* promoter ( $P_{micA-gfp}$ ) (Fig. S3) (44,

212 45). We also constructed a control plasmid expressing GFP from a housekeeping

213 RpoD-dependent promoter ( $P_{rpoD-gfp}$ ) to control for artifactual increases in fluorescence

214 (Fig. S3). We introduced each plasmid into the LspA, LolCDE, LolA, and LolB depletion

215 strains and measured growth and GFP fluorescence during depletion. We observed

216 increases in fluorescence from  $P_{osmB-gfp}$  when OM lipoprotein biogenesis factors were

217 depleted, indicating Rcs activation. Conversely, depletion did not strongly activate  $P_{micA-}$

218 *gfp*, with the exception of LspA. None of the depletion strains caused strong activation

219 of the control reporter,  $P_{rpoD-gfp}$ . Thus, we propose that the specific activation of Cpx

220 and Rcs is a strong indicator of OM lipoprotein biogenesis inhibition, while an absence

221 of  $\sigma^E$  activation is important for discrimination between specific OM lipoprotein defects

222 and generalized cell envelope defects.

223

224 **Chemical inhibitors of OM lipoprotein biogenesis conform to the biological**  
225 **signature.** Genetic depletions allowed us to establish three signature hallmarks of  
226 defects in OM lipoprotein biogenesis: (i) OM permeabilization, (ii) Lpp toxicity, (iii) and  
227 NlpE-specific activation of Cpx. We next tested our signature using chemical inhibition  
228 of the OM lipoprotein biogenesis pathway. We used two well-characterized compounds:  
229 globomycin (46) and the pyridine-imidazole “compound 2” (47) (Fig. 1). Globomycin  
230 inhibits LspA (48), while compound 2 inhibits LolCDE function (47).

231 To probe OM permeability, we assessed sensitivity to large scaffold antibiotics  
232 upon treatment with globomycin or compound 2 using checkerboard assays. As  
233 globomycin and compound 2 poorly penetrate *E. coli*, we tested a  $\Delta toIC$  strain in which  
234 antibiotic efflux is inactivated. A  $\Delta toIC$  strain should allow cellular accumulation of both  
235 compounds. Treatment with globomycin or compound 2 sensitized cells to vancomycin,  
236 indicating decreased integrity of the OM barrier (Fig. 5). Thus, both compounds satisfied  
237 the first criterium of the proposed biological signature.

238 We next tested whether  $\Delta lpp$  was protective against treatment with either  
239 inhibitor. In agreement with previous work,  $\Delta lpp$  increased the MIC of globomycin and  
240 compound 2 (Table 1) (47, 49). Therefore, both compounds fulfill the second criterium  
241 of our signature.

242 Finally, we tested stress response activation upon treatment with both inhibitors.  
243 Strains were treated with globomycin or compound 2 after 100 minutes of growth. Both  
244 compounds inhibited growth similarly. Almost immediately after treatment with either  
245 compound, we detected a strong increase in fluorescence from a  $P_{cpxP}$ -*gfp* reporter (Fig  
246 5). Deletion of *nlpE* delayed and strongly reduced GFP fluorescence upon treatment

247 with either compound. We found that globomycin induced fluorescence from Rcs-  
248 activated  $P_{osmB}$ -*gfp*, consistent with prior observations (Fig. S4). Treatment with  
249 compound 2 also increased fluorescence of  $P_{osmB}$ -*gfp* (Fig. S4). However, both  
250 globomycin and compound 2 caused little activation of the  $\sigma^E$ -dependent *micA* promoter  
251 ( $P_{micA}$ -*gfp*) (Fig. S4). Thus, both globomycin and compound 2 satisfy all three of our  
252 criteria and fully conform to our biological signature. Collectively, our data demonstrate  
253 that OM lipoprotein biogenesis defects, whether induced genetically or with chemical  
254 inhibitors, produce a distinctive biological signature of OM lipoprotein biogenesis  
255 inhibition.

256

257 **Proposed LolA inhibitor MAC13243 does not fit the biological signature.** Recent  
258 work proposed that MAC13243 inhibits LolA (50). Indeed, MAC13243 permeabilizes *E.*  
259 *coli* to large scaffold antibiotics (51), and LolA over-production protects against  
260 MAC13243 (50). Curiously, MAC13243 degrades into a thiourea compound closely  
261 related to A22, an inhibitor of the essential cytoskeletal protein MreB (52–54). *In vitro*,  
262 MAC13243 and A22 interact with purified LolA (54). However, clear *in vivo* LolA  
263 inhibition has yet to be demonstrated. We hypothesized that, if they target LolA *in vivo*,  
264 both MAC13243 and A22 would fit our biological signature.

265 As a control for LolA inhibition, we also designed an allele-specific system for  
266 inhibiting LolA. First, we introduced a V24C substitution in LolA. The V24 residue is  
267 proposed to be important to lipoprotein binding by LolA (26). A plasmid carrying  
268 *lolA*(V24C) complemented deletion of native *lolA*, indicating that the mutation does not  
269 reduce LolA activity. To inhibit LolA(V24C), we treated cells with the thiol-reactive

270 compound 2-[(methylsulfonyl)thio]-ethanesulfonic acid (MTSES). Previous work  
271 illustrated that, despite the potential effect of MTSES on any thiol group in the cell,  
272 clever introduction of cysteines at key sites causes protein-specific sensitivity to MTSES  
273 (55, 56). We reasoned that V24C would introduce an MTSES target within a functionally  
274 important region of LolA. Indeed, *lolA*(V24C) was more sensitive to MTSES than the  
275 *lolA*<sup>+</sup> (Table S1). Treatment with MTSES caused only minor growth defects in the *lolA*<sup>+</sup>  
276 strain, yet the same treatment was lethal in the *lolA*(V24C) strain (Fig. S5). Hence,  
277 MTSES allowed us to semi-selectively inhibit LolA in strains producing the V24C  
278 variant.

279 We tested MAC13243, A22, and our allele-specific MTSES inhibitor system using  
280 our biological signature. Treatment with MAC13243 increased sensitivity to novobiocin,  
281 vancomycin, and rifampicin, indicating increased OM permeability (Fig. 5). This is in  
282 keeping with previous observations that MAC13243 permeabilizes *E. coli* to vancomycin  
283 (51) and observations that A22 permeabilizes *E. coli* to novobiocin (57). Increasing  
284 concentrations of MTSES also increased sensitivity of LolA(V24C) to large scaffold  
285 antibiotics (Fig. 6, Fig. S6).

286 Since  $\Delta/lpp$  vastly improves viability when LolA is depleted, we expected  $\Delta/lpp$   
287 would make *E. coli* more tolerant to a compound targeting LolA. Indeed,  $\Delta/lpp$  increased  
288 the MIC of MTSES in the *lolA*(V24C) strain (Table S1). However,  $\Delta/lpp$  had no effect on  
289 the MIC of MAC13243 or A22 (Table 1). This suggests that toxic mislocalization of Lpp  
290 is not a significant contributor to the lethality of MAC13243 or A22.

291 Next, we evaluated Cpx activation upon chemical inhibition of LolA. Treatment of  
292 *lolA*(V24C) with MTSES caused rapid growth arrest and strong activation of Cpx, just as

293 we observed upon LolA depletion. Moreover, this activation was clearly NlpE-dependent  
294 (Fig. 6, Fig. S7). Treatment with MAC13243 or A22 also caused rapid growth inhibition  
295 and strong Cpx activation (Fig. 5). However, Cpx activation in response to MAC13243  
296 or A22 treatment was entirely NlpE-independent (Fig. 5). Analysis of Rcs activation  
297 showed that MTSES induced Rcs in a non allele-specific manner (Fig. S8). Both  
298 MAC13243 and A22 caused delayed Rcs activation (Fig. S4).

299 Thus, MAC13243 and A22 fail to meet the biological signature of OM lipoprotein  
300 biogenesis inhibition. Deletion of *lpp* does not alleviate lethal effects of either  
301 compound, and both compounds activate Cpx in an NlpE-independent manner. Our  
302 data suggest that treatment with these compounds does not appreciably inhibit OM  
303 lipoprotein biogenesis, suggesting LolA is not inhibited *in vivo*.

304

305 **MAC13243 activity is LolA-independent.** We sought to conclusively assess if the  
306 biological activity of MAC13243 occurs through inhibition of LolA *in vivo*. While *lolA* is  
307 essential in wildtype *E. coli*, genetic conditions exist under which both *lolA* and *lolB* can  
308 be deleted (28). As LolA and LolB work in concert, we examined the activity of  
309 MAC13243 in a strain lacking both LolA and LolB ( $\Delta lolAB$ ). We expected that  
310 MAC13243 would affect cells that produce LolA and LolB (*lolAB*<sup>+</sup>) but would not show  
311 activity in cells that lack the proposed LolA target ( $\Delta lolAB$ ). Surprisingly, we observed  
312 that MAC13243 causes OM permeabilization even in the absence of LolA (Fig. 7). Thus,  
313 the OM permeabilizing effect of MAC13243 is not dependent on LolA inhibition.

314 The inhibition of MreB by A22 is well characterized. Since MAC13243 is  
315 chemically similar to A22, we examined whether the permeabilizing effect of MAC13243

316 relied on MreB inhibition. An E143A substitution in MreB confers resistance to A22,  
317 likely by preventing its binding (58). Interestingly, an *mreB(E143A)* allele also increased  
318 resistance to MAC13243. Moreover, in a *mreB(E143A)* background, MAC13243 did not  
319 permeabilize the OM to large scaffold antibiotics (Fig. 7). Hence, the activity of  
320 MAC13243 was entirely dependent on a susceptible MreB protein and independent of  
321 the presence of LolA in the cell. Collectively, our data strongly argue that the *in vivo*  
322 target of MAC13243 is MreB, not LolA.

323

## 324 **DISCUSSION**

325 OM lipoprotein biogenesis is an attractive antibiotic target, as it is required for  
326 OM construction and integrity. However, there is currently no protocol for validating  
327 lipoprotein maturation or trafficking inhibitors. Herein, we establish a three-fold biological  
328 signature of OM lipoprotein biogenesis limitation: (i) permeabilization of the OM to large  
329 scaffold antibiotics, (ii) toxicity of Lpp, and (iii) NlpE-dependent activation of Cpx. This  
330 signature can be used to validate OM lipoprotein biogenesis inhibitors *in vivo*. Indeed,  
331 known inhibitors fully conform to this signature.

332 The first parameter of our biological signature is OM permeabilization. Prior work  
333 firmly established that mutations in the Bam and Lpt machines permeabilize the OM to  
334 antibiotics (59). This property has been exploited for genetic analysis of Bam and Lpt.  
335 Our data now show that the same chemical genetic logic extends to the OM lipoprotein  
336 biogenesis. Increased OM permeability is arguably the least discerning parameter in our  
337 biological signature, since permeability can be expected in response to defects in OM  
338 assembly, cell wall synthesis, or antibiotic efflux. As such, we see OM permeability as a

339 primary classifier, which, if not satisfied, can exclude compounds that do not target OM  
340 lipoprotein biogenesis.

341 The second parameter of our biological signature relies on increased viability in  
342 the absence of Lpp. Notably, we show that  $\Delta lpp$  alleviates defects in any stage of OM  
343 lipoprotein biogenesis yet does not alleviate defects in other OM assembly pathways  
344 (Bam and Lpt). The covalent linkage between OM-localized Lpp and cell wall  
345 peptidoglycan serves an important role in cell envelope architecture (34, 35). However,  
346 when Lpp cross-links from the IM, it is lethal to the cell (36). Defects at any stage in OM  
347 lipoprotein biogenesis should cause Lpp to accumulate in the IM, and deletion of *lpp*  
348 prevents lethal toxicity. In fact, *lpp* mutations alleviate temperature-sensitivity of *E. coli*  
349 or *Salmonella lgt* mutations (60, 61) and confer resistance to globomycin or LolCDE-  
350 targeting chemical inhibitors (47, 49).

351 Loss-of-function *lpp* mutations can be isolated with high frequency in the  
352 laboratory, suggesting a ready genetic route for resistance to novel therapeutics  
353 targeting OM lipoprotein biogenesis. Yet, it is unclear that similar *lpp* mutations could be  
354 isolated in a clinical context. The absence of Lpp dysregulates the cell envelope  
355 architecture, which leads to excessive OM blebbing and hypersensitivity to detergents  
356 frequently encountered by enteric bacteria, such as bile salts (62). Indeed,  $\Delta lpp$  mutants  
357 survive poorly in mammalian hosts and are highly sensitive to complement-mediated  
358 immune clearance in serum (63–67). Therefore, although *lpp* is not essential in the  
359 laboratory, there is strong evidence to suggest that *lpp* is essential for infection. It is  
360 highly unlikely that *lpp* mutations could arise inside patients or animals treated with OM  
361 lipoprotein biogenesis inhibitors. Similarly, *Acinetobacter baumannii* mutants that no



362 longer produce lipooligosaccharide can be readily isolated in the lab following colistin  
363 selection, but no such mutants have been recovered clinically from colistin-treated  
364 patients (68, 69).

365         A recent study described a macrocyclic peptide (G2824) that inhibits Lgt activity  
366 and is bactericidal to *E. coli* (70). Notably,  $\Delta lpp$  did not confer resistance to G2824. In  
367 fact,  $\Delta lpp$  sensitized bacteria to G2824. This is unexpected in light of our data showing  
368 that  $\Delta lpp$  significantly increased viability of Lgt-depleted *E. coli* and other studies  
369 reporting that *lpp* mutations alleviate the effects of defective *lgt* alleles (60, 61). G2824  
370 has two reported activities: it impedes lipoprotein modification by Lgt, and it prevents  
371 Lpp attachment to peptidoglycan. This dual activity suggests G2824 may have multiple  
372 targets *in vivo*. Both of the inhibited reactions, Lgt modification and Lpp attachment to  
373 peptidoglycan by the L,D-transpeptidases LdtABC, rely on cysteine residues. If G2824  
374 has affinity for cysteines in the periplasm, it would interfere with both lipoprotein  
375 maturation and Lpp-peptidoglycan attachment, as reported. This hypothesis requires  
376 testing, but such a generalized activity of G2824 in the cell envelope would explain why  
377  $\Delta lpp$  sensitizes *E. coli* treated with G2824. The absence of Lpp causes severe envelope  
378 disruption that is exacerbated by inhibiting transpeptidases and cysteine-dependent  
379 periplasmic reactions (71).

380         The final parameter of our biological signature of OM lipoprotein biogenesis  
381 inhibition is NlpE-dependent activation of Cpx. Recent work revealed that NlpE acts as  
382 a real-time sensor of lipoprotein stress (41, 72). When lipoprotein trafficking is disrupted,  
383 NlpE becomes trapped in the IM, where it signals to CpxA. In keeping with this model,  
384 we found that depletion or chemical inhibition of OM lipoprotein biogenesis causes

385 NlpE-dependent activation of Cpx. As lipoprotein trafficking is just one of the stressors  
386 to which CpxAR responds, general cell envelope defects likely still activate Cpx, yet  
387 they do so independently of NlpE. Although LspA depletion only caused NlpE-  
388 independent Cpx activation, globomycin, a well-studied LspA inhibitor, caused clear  
389 NlpE-dependent Cpx activation. The conformity of globomycin to our biological  
390 signature indicates the usefulness of our assay for validation of OM lipoprotein  
391 biogenesis inhibitors. NlpE allows rapid, robust activation of Cpx, speaking to its  
392 imperative role reacting to OM lipoprotein biogenesis stress and its usefulness as a  
393 criterium in the biological signature of OM lipoprotein biogenesis inhibition.

394 In addition to Cpx activation, our data indicate that Rcs activation is a strong  
395 indicator of OM lipoprotein biogenesis inhibition. Stress response activation is, thus, a  
396 powerful tool for the identification and validation of OM biogenesis inhibition. However,  
397 as measuring the NlpE-dependence of Cpx activation provides direct assessment of  
398 OM lipoprotein biogenesis, we found it to be the most informative parameter for  
399 identification of OM lipoprotein biogenesis inhibitors.

400 Finally, our results offer an essential conclusion to an ongoing discussion of the  
401 true target of MAC13243 *in vivo*. MAC13243 was originally discovered using  
402 overexpression of the essential genes of *E. coli* (50). Overexpression of LolA protected  
403 against treatment with MAC13243 (50). Later studies found that MAC13243 degrades  
404 under aqueous conditions into S-(4-chlorobenzyl)isothiourea, a close analog of the  
405 known MreB inhibitor A22 (54). *In vitro*, MAC13243, its S-(4-chlorobenzyl)isothiourea  
406 derivative, and A22 were all suggested to bind purified LolA (54). Given this evidence,  
407 MAC13243 has been embraced in the field as a LolA inhibitor (73–76). Our results,

408 however, indicate that neither MAC13243 nor A22 conform to the expected signature of  
409 an OM lipoprotein biogenesis inhibitor. As  $\Delta/pp$  offers no protection and Cpx activation  
410 is NlpE-independent in response to MAC13243 or A22 treatment, we suggest that  
411 neither compound appreciably impedes LolA activity *in vivo*. MAC13243 and A22 only  
412 conform to one criterium of our signature: OM permeabilization. Interestingly, we found  
413 that MAC13243 still causes OM permeabilization in the absence of LolA. Conversely,  
414 OM permeabilization does require a susceptible allele of *mreB*.

415 Comparing otherwise isogenic *lolAB*<sup>+</sup> and  $\Delta lolAB$  strains, we detected an  
416 increase in sensitivity to vancomycin. Hence, the loss of the LolAB trafficking pathway  
417 caused additional antibiotic sensitivity. We would expect that a compound that inhibits  
418 LolA should similarly sensitize to vancomycin. However, we failed to see any  
419 sensitization to vancomycin, even at high concentrations of MAC13243, in either *mreB*<sup>+</sup>  
420 or *mreB(E143A)*. Collectively our data strongly argue against any *in vivo* activity of  
421 MAC13243 against LolA. Recent evidence also supports this conclusion.  
422 Overexpression of an inhibitor's target can confer resistance to some inhibitors. This  
423 was the interpretation originally used to explain how LolA overexpression provides  
424 resistance to MAC13243. However, recent work found that LolA overexpression triggers  
425 activation of Rcs, explaining the protective effect of LolA overexpression again  
426 MAC13243 (77). Inactivation of Rcs abolished the protective effect of LolA  
427 overexpression. Thus, it is Rcs activation, not LolA overexpression, that is protective.  
428 Given our evidence, MAC13243 should be classified as an MreB-inhibiting compound,  
429 since it has no apparent activity against LolA *in vivo*.

430 We propose that the described biological signature discerns between those  
431 compounds that specifically inhibit OM lipoprotein biogenesis and those that interfere  
432 with the closely related processes of OM or cell envelope assembly. In an age of  
433 increasing antibiotic resistance, discovery efforts are imperative, yet lead compound  
434 target validation *in vivo*, especially for compounds targeting essential proteins and  
435 processes, remains challenging. Several groups have recently established clever  
436 methods to act as roadmaps for discovery and validation of on-pathway inhibitors of a  
437 variety of cellular pathways, including  $\beta$ -barrel assembly and cell elongation (77, 78).  
438 Our biological signature of OM lipoprotein biogenesis adds to this suite of resources,  
439 providing an invaluable tool for rapid validation of inhibitors of OM lipoprotein  
440 biogenesis.

441

## 442 MATERIALS AND METHODS

443

444 **Strain Construction.** Strains and plasmids used are provided in Tables S2 and S3,  
445 respectively. Oligonucleotides used in constructing strains and plasmids are provided in  
446 Table S4. Strains were grown in Lennox Broth (LB) supplemented with ampicillin (Amp,  
447 125 mg/L), spectinomycin (Spec, 50 mg/L), kanamycin (Kan, 25 mg/L) or arabinose  
448 (Ara, 0.2% w/v) as needed. The *tolC* and *lpp* kanamycin-resistant deletion-insertion  
449 mutants were obtained from the Keio collection (79). The  $\Delta lolA::kan$ ,  $\Delta lolB::kan$ ,  
450  $\Delta nlpE::spec$ , and  $\Delta lolCDE::cam$  alleles were previously described (28, 80). Deletion-  
451 insertion mutations and the complementing constructs of *lspA*, *Int*, and *lgt* have also  
452 been previously described (37, 81, 82). A22-resistant *mreB(E143A)* was previously

453 described (58). Strains were constructed by standard P1 *vir* transduction of antibiotic  
454 resistance-marked alleles or by standard plasmid transformations.

455

456 **Checkerboard Assays.** Overnight cultures were diluted to  $OD_{600}=0.1$ , then further  
457 diluted 1:1,000 into fresh broth. For LspA, LolCDE, LolA, and LolB depletion strains, 60  
458  $\mu$ L of subculture was added to each well of a 96-well microtiter plate. Next, varying  
459 amounts of arabinose (diluted in LB broth) were added in a volume of 20  $\mu$ L. Finally,  
460 varying concentrations of antibiotic (diluted in LB broth) were added in a volume of 20  
461  $\mu$ L. Plates were sealed with Breathe-Easy Gas Permeable Film (Sigma Z380059) and  
462 incubated overnight at 37°C. For checkerboard assays using MTSES, subcultures were  
463 prepared as above in 60  $\mu$ L LB with 0.2% arabinose. To each well, varying MTSES  
464 amounts (20  $\mu$ L) and varying antibiotic amounts (20  $\mu$ L) were added. Plates were  
465 incubated for 48 hours at 30°C. For MAC13243 checkerboard assays, cultures were  
466 prepared as above in 60  $\mu$ L volume (without arabinose). Varying amounts of MAC13243  
467 (in 20  $\mu$ L) and antibiotic (in 20  $\mu$ L) were added to each well. Checkerboard assays using  
468 globomycin and compound 2 were prepared as above but scaled down to 40  $\mu$ L final  
469 volume in a 384-well microtiter plate. In all cases,  $A_{600nm}$  was read using a Synergy H1  
470 microplate reader (Biotek).

471

472 **MTSES growth curves and GFP reporter assays.** Overnight cultures were diluted  
473 1:1,000 into LB broth supplemented with arabinose (0.02%) and Kan, where  
474 appropriate. Aliquots of 1.96 mL seeded each well of a 24-well microtiter plate. Plates  
475 were sealed with breathable film and incubated at 37°C with shaking in a Synergy H1,

476 measuring  $A_{600nm}$ . After 180 mins, MTSES or vehicle control DMSO was added in a  
477 volume of 40  $\mu$ l. Plates were then returned to the plate reader.

478

479 **Cell Viability Assays.** Overnight cultures of depletion strains (*lpp*<sup>+</sup> or  $\Delta$ *lpp*) were grown  
480 in LB supplemented with 0.2% arabinose. Dilutions of the saturated culture were plated  
481 onto LB with arabinose and LB alone. Plates were incubated at 37°C overnight. Viable  
482 counts were enumerated as colony-forming units per mL of culture. The ratio of viable  
483 cells in the presence or absence of arabinose was calculated.

484

485 **MIC assays.** Cultures ( $5 \times 10^4$  cells/mL) were seeded (98  $\mu$ L) into wells of a 96-well  
486 microtiter plate. Two-fold serial dilutions of antibiotic or chemical compound were added  
487 in a volume of 2  $\mu$ L. Plates were incubated overnight at 37°C.

488

489 **GFP Reporter Plasmids and cloning.** Cpx, Rcs, and RpoD GFP transcriptional  
490 reporters were constructed by amplifying the promoter regions of *cpxP*, *osmB*, and *rpoD*  
491 using the primers listed in Table S3. Amplicons were used in Gibson assembly  
492 reactions with pUA66 (44) to generate plasmids. A Strep II affinity tag was introduced to  
493 the C-terminus of LolA using a PCR site-directed insertion strategy. The V24C  
494 substitution was introduced by PCR site-directed mutagenesis.

495

496 **GFP Reporter Assays.** Overnight cultures of GFP reporter strains were subcultured  
497 into fresh LB and 198  $\mu$ L was seeded into black 96-well microtiter plates. Varying  
498 amounts of inducer or compound were added in a volume of 2  $\mu$ L. Plates were grown at

499 37°C with shaking in a Synergy H1 plate reader (Biotek), and  $A_{600nm}$  and GFP  
500 fluorescence was measured every 10 mins. The amount of GFP per cell was calculated  
501 as a ratio of fluorescence to  $A_{600nm}$ .

502

503

504

505

506

507

## 508 REFERENCES

- 509 1. Lewis K. 2020. The science of antibiotic discovery. *Cell* 181:29–45.
- 510 2. Nikaido H. 2003. Molecular basis of bacterial outer membrane permeability revisited.  
511 *Microbiology and Molecular Biology Reviews* 67:593–656.
- 512 3. Lehman KM, Grabowicz M. 2019. Countering Gram-negative antibiotic resistance:  
513 Recent progress in disrupting the outer membrane with novel therapeutics. *Antibiotics*  
514 8:1–18.
- 515 4. MacNair CR, Tsai CN, Brown ED. 2020. Creative targeting of the Gram-negative outer  
516 membrane in antibiotic discovery. *Annals of the New York Academy of Sciences*  
517 1459:69–85.
- 518 5. Kamio Y, Nikaido H. 1976. Outer membrane of *Salmonella typhimurium*: accessibility of  
519 phospholipid head groups to phospholipase C and cyanogen bromide activated dextran in  
520 the external medium. *Biochemistry* 15:2561–2570.
- 521 6. May KL, Silhavy TJ. 2017. Making a membrane on the other side of the wall. *Biochimica*  
522 *et Biophysica Acta (BBA) - Molecular and Cell Biology of Lipids* 1862:1386–1393.
- 523 7. Okuda S, Sherman DJ, Silhavy TJ, Ruiz N, Kahne D. 2016. Lipopolysaccharide transport  
524 and assembly at the outer membrane: The PEZ model. *Nature Reviews Microbiology*  
525 14:337–345.
- 526 8. Tomasek D, Kahne D. 2021. The assembly of  $\beta$ -barrel outer membrane proteins. *Current*  
527 *Opinion in Microbiology* 60:16–23.
- 528 9. Grabowicz M. 2018. Lipoprotein transport: Greasing the machines of outer membrane  
529 biogenesis. *BioEssays* 40:1–11.
- 530 10. Malinverni JC, Werner J, Kim S, Sklar JG, Kahne D, Misra R, Silhavy TJ. 2006. YfiO  
531 stabilizes the YaeT complex and is essential for outer membrane protein assembly in  
532 *Escherichia coli*. *Molecular Microbiology* 61:151–164.



- 533 11. Ruiz N, Gronenberg LS, Kahne D, Silhavy TJ. 2008. Identification of two inner-  
534 membrane proteins required for the transport of lipopolysaccharide to the outer membrane  
535 of *Escherichia coli*. *Proceedings of the National Academy of Sciences* 105:5537–5542.
- 536 12. Tanaka K, Matsuyama SI, Tokuda H. 2001. Deletion of lolB, encoding an outer  
537 membrane lipoprotein, is lethal for *Escherichia coli* and causes accumulation of  
538 lipoprotein localization intermediates in the periplasm. *Journal of Bacteriology* 183:6538–  
539 6542.
- 540 13. Fukuda A, Matsuyama S, Hara T, Nakayama J, Nagasawa H, Tokuda H. 2002.  
541 Aminoacylation of the N-terminal Cysteine Is Essential for Lol-dependent Release of  
542 Lipoproteins from Membranes but Does Not Depend on Lipoprotein Sorting Signals \*.  
543 *The Journal Biological Chemistry* 277:43512–43518.
- 544 14. Buddelmeijer N. 2015. The molecular mechanism of bacterial lipoprotein modification—  
545 How, when and why? *FEMS Microbiology Reviews* 39:246–261.
- 546 15. Sankaran K, Wu HC. 1994. Lipid modification of bacterial prolipoprotein. Transfer of  
547 diacylglycerol moiety from phosphatidylglycerol. *The Journal of biological chemistry*  
548 269:19701–6.
- 549 16. Inouye S, Franceschini T, Sato M, Itakurai K, Inouye M. 1983. Prolipoprotein signal  
550 peptidase of *Escherichia coli* requires a cysteine residue at the cleavage site. *The EMBO*  
551 *Journal* 2:87–91.
- 552 17. Tokunaga M, Loranger JM, Wu HC. 1984. A distinct signal peptidase for prolipoprotein  
553 in *Escherichia coli*. *Journal of Cellular Biochemistry* 24:113–120.
- 554 18. Gupta S, Wu HC. 1990. Identification and subcellular localization of apolipoprotein N-  
555 acyltransferase in *Escherichia coli*. *FEMS Microbiology Letters* 78:37–42.
- 556 19. Noland CL, Kattke MD, Diao J, Gloor SL, Pantua H, Reichelt M, Katakam AK, Yan D,  
557 Kang J, Zilberleyb I, Xu M, Kapadia SB, Murray JM. 2017. Structural insights into  
558 lipoprotein N-acylation by *Escherichia coli* apolipoprotein N-acyltransferase. *Proceedings*  
559 *of the National Academy of Sciences* 114:E6044–E6053.
- 560 20. Gwin CM, Prakash N, Christian Belisario J, Haider L, Rosen ML, Martinez LR, Rigel  
561 NW. 2018. The apolipoprotein N-acyl transferase Lnt is dispensable for growth in  
562 *Acinetobacter* species. *Microbiology* 164:1547–1556.
- 563 21. LoVullo ED, Wright LF, Isabella V, Huntley JF, Pavelka MS. 2015. Revisiting the Gram-  
564 Negative lipoprotein paradigm. *Journal of Bacteriology* 197:1705–1715.
- 565 22. Masuda K, Matsuyama S, Tokuda H. 2002. Elucidation of the function of lipoprotein-  
566 sorting signals that determine membrane localization. *Proceedings of the National*  
567 *Academy of Sciences* 99:7390–73895.
- 568 23. Tanaka S, Narita S, Tokuda H. 2007. Characterization of the *Pseudomonas aeruginosa* Lol  
569 System as a Lipoprotein Sorting Mechanism \* □. *The Journal of Biological Chemistry*  
570 282:13379–13384.
- 571 24. Grabowicz M. 2019. Lipoproteins and their trafficking to the outer membrane. *EcoSal*  
572 *Plus* 8.
- 573 25. Yakushi T, Masuda K, Narita S, Matsuyama S, Tokuda H. 2000. A new ABC transporter  
574 mediating the detachment of lipid-modified proteins from membranes. *Nature Cell*  
575 *Biology* 2:212–218.
- 576 26. Okuda S, Tokuda H. 2009. Model of mouth-to-mouth transfer of bacterial lipoproteins  
577 through inner membrane LolC, periplasmic LolA, and outer membrane LolB. *Proceedings*  
578 *of the National Academy of Sciences* 106:5877–5882.



- 579 27. Kaplan E, Greene NP, Crow A, Koronakis V. 2018. Insights into bacterial lipoprotein  
580 trafficking from a structure of LolA bound to the LolC periplasmic domain. *Proceedings*  
581 *of the National Academy of Sciences* 115:E7389–E7397.
- 582 28. Grabowicz M, Silhavy TJ. 2017. Redefining the essential trafficking pathway for outer  
583 membrane lipoproteins. *Proceedings of the National Academy of Sciences* 114:4769–  
584 4774.
- 585 29. Caro F, Place NM, Mekalanos JJ. 2019. Analysis of lipoprotein transport depletion in  
586 *Vibrio cholerae* using CRISPRi. *Proceedings of the National Academy of Sciences* 0:1–  
587 10.
- 588 30. Nayar AS, Dougherty TJ, Ferguson KE, Granger BA, McWilliams L, Stacey C, Leach LJ,  
589 Narita S, Tokuda H, Miller AA, Brown DG, McLeod SM. 2015. Novel antibacterial  
590 targets and compounds revealed by a high-throughput cell wall reporter assay. *Journal of*  
591 *Bacteriology* 197:1726–1734.
- 592 31. Nickerson NN, Jao CC, Xu Y, Quinn J, Skippington E, Alexander MK, Miu A, Skelton N,  
593 Hankins J v., Lopez MS, Koth CM, Rutherford S, Nishiyama M. 2018. A novel inhibitor  
594 of the LolCDE ABC transporter essential for lipoprotein trafficking in Gram-negative  
595 bacteria. *Antimicrobial Agents and Chemotherapy* 62:1–16.
- 596 32. Rigel NW, Ricci DP, Silhavy TJ. 2013. Conformation-specific labeling of BamA and  
597 suppressor analysis suggest a cyclic mechanism for  $\beta$ -barrel assembly in *Escherichia coli*.  
598 *Proceedings of the National Academy of Sciences* 110:5151–5156.
- 599 33. Braun V, Rehn K. 1969. Chemical characterization, spatial distribution and function of a  
600 lipoprotein (Murein-Lipoprotein) of the *E. coli* cell wall. The specific effect of trypsin on  
601 the membrane structure. *European Journal of Biochemistry* 10:426–438.
- 602 34. Mathelié-Guinlet M, Asmar AT, Collet J-F, Dufrêne YF. 2020. Lipoprotein Lpp regulates  
603 the mechanical properties of the *E. coli* cell envelope. *Nature Communications* 11:1789.
- 604 35. Mandela E, Stubenrauch CJ, Ryoo D, Hwang H, Cohen EJ, Torres VL, Deo P, Webb CT,  
605 Huang C, Schittenhelm RB, Beeby M, Gumbart J, Lithgow T, Hay ID. 2022. Adaptation  
606 of the periplasm to maintain spatial constraints essential for cell envelope processes and  
607 cell viability. *eLife* 11:1–21.
- 608 36. Yakushi T, Tajima T, Matsuyama S, Tokuda H. 1997. Lethality of the covalent linkage  
609 between mislocalized major outer membrane lipoprotein and the peptidoglycan of  
610 *Escherichia coli*. *Journal of Bacteriology* 179:2857–2862.
- 611 37. Xiao Y, Wall D. 2014. Genetic redundancy, proximity, and functionality of *lspA*, the  
612 target of antibiotic TA, in the *Myxococcus xanthus* producer strain. *Journal of*  
613 *Bacteriology* 196:1174–1183.
- 614 38. Mitchell AM, Silhavy TJ. 2019. Envelope stress responses: Balancing damage repair and  
615 toxicity. *Nature Reviews Microbiology* 17:417–428.
- 616 39. Hews CL, Cho T, Rowley G, Raivio TL. 2019. Maintaining integrity under stress:  
617 Envelope stress response regulation of pathogenesis in Gram-Negative bacteria. *Frontiers*  
618 *in Cellular and Infection Microbiology* 9:1–25.
- 619 40. Vogt SL, Raivio TL. 2012. Just scratching the surface: An expanding view of the Cpx  
620 envelope stress response. *FEMS Microbiology Letters* [https://doi.org/10.1111/j.1574-](https://doi.org/10.1111/j.1574-6968.2011.02406.x)  
621 [6968.2011.02406.x](https://doi.org/10.1111/j.1574-6968.2011.02406.x).
- 622 41. Delhaye A, Laloux G, Collet JF. 2019. The Lipoprotein NlpE Is a Cpx Sensor That Serves  
623 as a Sentinel for Protein Sorting and Folding Defects in the *Escherichia coli* Envelope.  
624 *Journal of Bacteriology* 201:e00611-18.

- 625 42. May KL, Lehman KM, Mitchell AM, Grabowicz M. 2019. A stress response monitoring  
626 lipoprotein trafficking to the outer membrane. *mBio* 10.
- 627 43. Shiba Y, Miyagawa H, Nagahama H, Matsumoto K, Kondo D, Matsuoka S, Matsumoto  
628 K, Hara H. 2012. Exploring the relationship between lipoprotein mislocalization and  
629 activation of the Rcs signal transduction system in *Escherichia coli*. *Microbiology*  
630 158:1238–1248.
- 631 44. Mutalik VK, Nonaka G, Ades SE, Rhodius VA, Gross CA. 2009. Promoter strength  
632 properties of the complete sigma E regulon of *Escherichia coli* and *Salmonella enterica*.  
633 *Journal of Bacteriology* 191:7279–7287.
- 634 45. Konovalova A, Mitchell AM, Silhavy TJ. 2016. A lipoprotein/ $\beta$ -barrel complex monitors  
635 lipopolysaccharide integrity transducing information across the outer membrane. *eLife*  
636 5:1–17.
- 637 46. Inukai M, Nakajima M, Ōsawa M, Haneishi T, Arai M. 1978. Globomycin, a new peptide  
638 antibiotic with spheroplast-forming activity: Isolation and physico-chemical and  
639 biological characterization. *The Journal of Antibiotics* 31:421–425.
- 640 47. McLeod SM, Fleming PR, MacCormack K, McLaughlin RE, Whiteaker JD, Narita S,  
641 Mori M, Tokuda H, Miller AA. 2015. Small-molecule inhibitors of Gram-Negative  
642 lipoprotein trafficking discovered by phenotypic screening. *Journal of Bacteriology*  
643 197:1075–1082.
- 644 48. Vogeley L, el Arnaout T, Bailey J, Stansfeld PJ, Boland C, Caffrey M. 2016. Structural  
645 basis of lipoprotein signal peptidase II action and inhibition by the antibiotic globomycin.  
646 *Science* 351:876–880.
- 647 49. Zwiebel LJ, Inukai M, Nakamura K, Inouye M. 1981. Preferential selection of deletion  
648 mutations of the outer membrane lipoprotein gene of *Escherichia coli* by globomycin.  
649 *Journal of Bacteriology* 145:654–656.
- 650 50. Pathania R, Zlitni S, Barker C, Das R, Gerritsma DA, Lebert J, Awuah E, Melacini G,  
651 Capretta FA, Brown ED. 2009. Chemical genomics in *Escherichia coli* identifies an  
652 inhibitor of bacterial lipoprotein targeting. *Nature Chemical Biology* 5:849–856.
- 653 51. Muheim C, Götzke H, Eriksson AU, Lindberg S, Lauritsen I, Nørholm MHH, Daley DO.  
654 2017. Increasing the permeability of *Escherichia coli* using MAC13243. *Scientific*  
655 *Reports* 7:17629.
- 656 52. Iwai N, Nagai K, Wachi M. 2002. Novel S -Benzylisothiurea Compound That Induces  
657 Spherical Cells in *Escherichia coli* Probably by Acting on a Rod-shape-determining  
658 Protein(s) Other Than Penicillin-binding Protein 2. *Bioscience, Biotechnology, and*  
659 *Biochemistry* 66:2658–2662.
- 660 53. Bean GJ, Flickinger ST, Westler WM, Mccully ME, Sept D, Weibel DB, Amann KJ.  
661 2009. A22 disrupts the bacterial actin cytoskeleton by directly binding and inducing a  
662 low-affinity state in MreB. *Biochemistry* 48:4852–4857.
- 663 54. Barker CA, Allison SE, Zlitni S, Nguyen ND, Das R, Melacini G, Capretta AA, Brown  
664 ED. 2013. Degradation of MAC13243 and studies of the interaction of resulting thiourea  
665 compounds with the lipoprotein targeting chaperone LolA. *Bioorganic and Medicinal*  
666 *Chemistry Letters* 23:2426–2431.
- 667 55. Butler EK, Davis RM, Bari V, Nicholson PA, Ruiz N. 2013. Structure-function analysis of  
668 MurJ reveals a solvent-exposed cavity containing residues essential for peptidoglycan  
669 biogenesis in *Escherichia coli*. *Journal of Bacteriology* 195:4639–4649.

- 670 56. Sham L-T, Butler EK, Lebar MD, Kahne D, Bernhardt TG, Ruiz N. 2014. MurJ is the  
671 flippase of lipid-linked precursors for peptidoglycan biogenesis. *Science* 345:220–222.
- 672 57. Taylor PL, Rossi L, de Pascale G, Wright GD. 2012. A forward chemical screen identifies  
673 antibiotic adjuvants in *Escherichia coli*. *ACS Chemical Biology* 7:1547–1555.
- 674 58. Ouzounov N, Nguyen JP, Bratton BP, Jacobowitz D, Gitai Z, Shaevitz JW. 2016. MreB  
675 orientation correlates with cell diameter in *Escherichia coli*. *Biophysical Journal*  
676 111:1035–1043.
- 677 59. Ruiz N, Falcone B, Kahne D, Silhavy TJ. 2005. Chemical Conditionality : A Genetic  
678 Strategy to Probe Organelle Assembly. *Cell* 121:307–317.
- 679 60. Gan K, Gupta SD, Sankaran K, Schmid MB, Wu HC. 1993. Isolation and characterization  
680 of a temperature-sensitive mutant of *Salmonella typhimurium* defective in prolipoprotein  
681 modification. *Journal of Biological Chemistry* 268:16544–16550.
- 682 61. Gan K, Sankaran K, Williams MG, Aldea † Marti, Rudd KE, Kushner SR, Wu HC. 1995.  
683 The *umpA* Gene of *Escherichia coli* Encodes Phosphatidylglycerol:Prolipoprotein  
684 Diacylglyceryl Transferase (*lgt*) and regulates thymidylate synthase levels through  
685 translational coupling. *Journal of Bacteriology* 177:1879–1882.
- 686 62. Asmar AT, Collet JF. 2018. Lpp, the Braun lipoprotein, turns 50—major achievements  
687 and remaining issues. *FEMS Microbiology Letters* 365:1–8.
- 688 63. Phan M-D, Peters KM, Sarkar S, Lukowski SW, Allsopp LP, Moriel DG, Achard MES,  
689 Totsika M, Marshall VM, Upton M, Beatson SA, Schembri MA. 2013. The serum  
690 resistome of a globally disseminated multidrug resistant uropathogenic *Escherichia coli*  
691 clone. *PLoS Genetics* 9:e1003834.
- 692 64. Sha J, Agar SL, Baze WB, Olano JP, Fadl AA, Erova TE, Wang S, Foltz SM, Suarez G,  
693 Motin VL, Chauhan S, Klimpel GR, Peterson JW, Chopra AK. 2008. Braun lipoprotein  
694 (Lpp) contributes to virulence of *Yersinia*: Potential role of Lpp in inducing bubonic and  
695 pneumonic plague. *Infection and Immunity* 76:1390–1409.
- 696 65. Fadl AA, Sha J, Klimpel GR, Olano JP, Niesel DW, Chopra AK. 2005. Murein  
697 lipoprotein is a critical outer membrane component involved in *Salmonella enterica*  
698 serovar Typhimurium systemic infection. *Infection and Immunity* 73:1081–1096.
- 699 66. Diao J, Bouwman C, Yan D, Kang J, Katakam AK, Liu P, Pantua H, Abbas AR,  
700 Nickerson NN, Austin C, Reichelt M, Sandoval W, Xu M, Whitfield C, Kapadia SB.  
701 2017. Peptidoglycan association of murein lipoprotein is required for KpsD-dependent  
702 group 2 capsular polysaccharide expression and serum resistance in a uropathogenic  
703 *Escherichia coli* isolate. *mBio* 8:e00603-17.
- 704 67. Sha J, Fadl AA, Klimpel GR, Niesel DW, Popov VL, Chopra AK. 2004. The Two Murein  
705 Lipoproteins of *Salmonella enterica* Serovar Typhimurium Contribute to the Virulence of  
706 the Organism. *Infection and Immunity* 72:3987–4003.
- 707 68. Moffatt JH, Harper M, Harrison P, Hale JDF, Vinogradov E, Seemann T, Henry R, Crane  
708 B, st. Michael F, Cox AD, Adler B, Nation RL, Li J, Boyce JD. 2010. Colistin resistance  
709 in *Acinetobacter baumannii* is mediated by complete loss of lipopolysaccharide  
710 production. *Antimicrobial Agents and Chemotherapy* 54:4971–4977.
- 711 69. Boll JM, Crofts AA, Peters K, Cattoir V, Vollmer W, Davies BW, Trent MS. 2016. A  
712 penicillin-binding protein inhibits selection of colistin-resistant, lipooligosaccharide-  
713 deficient *Acinetobacter baumannii*. *Proceedings of the National Academy of Sciences*  
714 113:E6228–E6237.

- 715 70. Diao J, Komura R, Sano T, Pantua H, Storek KM, Inaba H, Ogawa H, Noland CL, Peng  
716 Y, Gloor SL, Yan D, Kang J, Katakam AK, Volny M, Liu P, Nickerson NN, Sandoval W,  
717 Austin CD, Murray J, Rutherford ST, Reichelt M, Xu Y, Xu M, Yanagida H, Nishikawa J,  
718 Reid PC, Cunningham CN, Kapadia SB. 2021. Inhibition of *Escherichia coli* Lipoprotein  
719 Diacylglyceryl Transferase is insensitive to resistance caused by deletion of Braun's  
720 lipoprotein. *Journal of Bacteriology* 203:e00149-21.
- 721 71. Collet J-F, Cho SH, Iorga BI, Goemans C v. 2020. How the assembly and protection of  
722 the bacterial cell envelope depend on cysteine residues. *JBC Reviews* 295:11984–11994.
- 723 72. May KL, Lehman KM, Mitchell AM, Grabowicz M. 2019. A stress response monitoring  
724 lipoprotein trafficking to the outer membrane. *mBio* 10:1–14.
- 725 73. Boags A, Samsudin F, Khalid S. 2019. Details of hydrophobic entanglement between  
726 small molecules and Braun's lipoprotein within the cavity of the bacterial chaperone  
727 LolA. *Scientific reports* 9:3717.
- 728 74. Muheim C, Götzke H, Eriksson AU, Lindberg S, Lauritsen I, Nørholm MHH, Daley DO.  
729 2017. Increasing the permeability of *Escherichia coli* using MAC13243. *Scientific reports*  
730 7:17629.
- 731 75. Pandeya A, Ojo I, Alegun O, Wei Y. 2020. Periplasmic targets for the development of  
732 effective antimicrobials against Gram-Negative bacteria. *ACS infectious diseases* 6:2337–  
733 2354.
- 734 76. Pedebos C, Smith IPS, Boags A, Khalid S. 2021. The hitchhiker's guide to the periplasm:  
735 Unexpected molecular interactions of polymyxin B1 in *E. coli*. *Structure (London,*  
736 *England : 1993)* 29:444-456.e2.
- 737 77. Buss JA, Baidin V, Welsh MA, Flores-Kim J, Cho H, Wood BM, Uehara T, Walker S,  
738 Kahne D, Bernhardt TG. 2019. Pathway-directed screen for inhibitors of the bacterial cell  
739 elongation machinery. *Antimicrobial Agents and Chemotherapy* 63:1–14.
- 740 78. Konovalova A, Grabowicz M, Balibar CJ, Malinverni JC, Painter RE, Riley D, Mann PA,  
741 Wang H, Garlisi CG, Sherborne B, Rigel NW, Ricci DP, Black TA, Roemer T, Silhavy  
742 TJ, Walker SS. 2018. Inhibitor of intramembrane protease RseP blocks the  $\sigma^E$  response  
743 causing lethal accumulation of unfolded outer membrane proteins. *Proceedings of the*  
744 *National Academy of Sciences* 115:E6614–E6621.
- 745 79. Baba T, Ara T, Hasegawa M, Takai Y, Okumura Y, Baba M, Datsenko KA, Tomita M,  
746 Wanner BL, Mori H. 2006. Construction of *Escherichia coli* K-12 in-frame, single-gene  
747 knockout mutants: the Keio collection. *Molecular Systems Biology* 2.
- 748 80. Snyder WB, Davis LJ, Danese PN, Cosma CL, Silhavy TJ. 1995. Overproduction of  
749 NlpE, a new outer membrane lipoprotein, suppresses the toxicity of periplasmic LacZ by  
750 activation of the Cpx signal transduction pathway. *Journal of Bacteriology* 177:4216–  
751 4223.
- 752 81. Pailler J, Aucher W, Pires M, Buddelmeijer N. 2012. Phosphatidylglycerol::Prolipoprotein  
753 Diacylglyceryl Transferase (Lgt) of *Escherichia coli* has seven transmembrane segments,  
754 and its essential residues are embedded in the membrane. *Journal of Bacteriology*  
755 194:2142–2151.
- 756 82. Armbruster KM, Meredith TC. 2017. Identification of the Lyso-Form *N*-Acyl  
757 Intramolecular Transferase in Low-GC Firmicutes. *Journal of Bacteriology* 199.
- 758

759

760 **Acknowledgements:**

761 This work was supported by grant 1R35GM133509 (to M.G.), fellowship F31AI147589  
762 (to K.L.) and training grant T32AI106699 (to H.S.). We thank Daniel Wall (University of  
763 Wyoming), Nienke Buddelmeijer (Institut Pasteur), and Timothy Meredith (Pennsylvania  
764 State University) for providing LspA, Lgt, and Lnt depletion strains, respectively. We  
765 thank Benjamin Bratton (Vanderbilt University Medical Center) for  
766 providing *mreB* alleles. We are grateful to Kerrie May, William Shafer, and all members  
767 of the Grabowicz lab for helpful discussions and critical review of the manuscript. The  
768 authors declare no conflicts of interest.

769

770

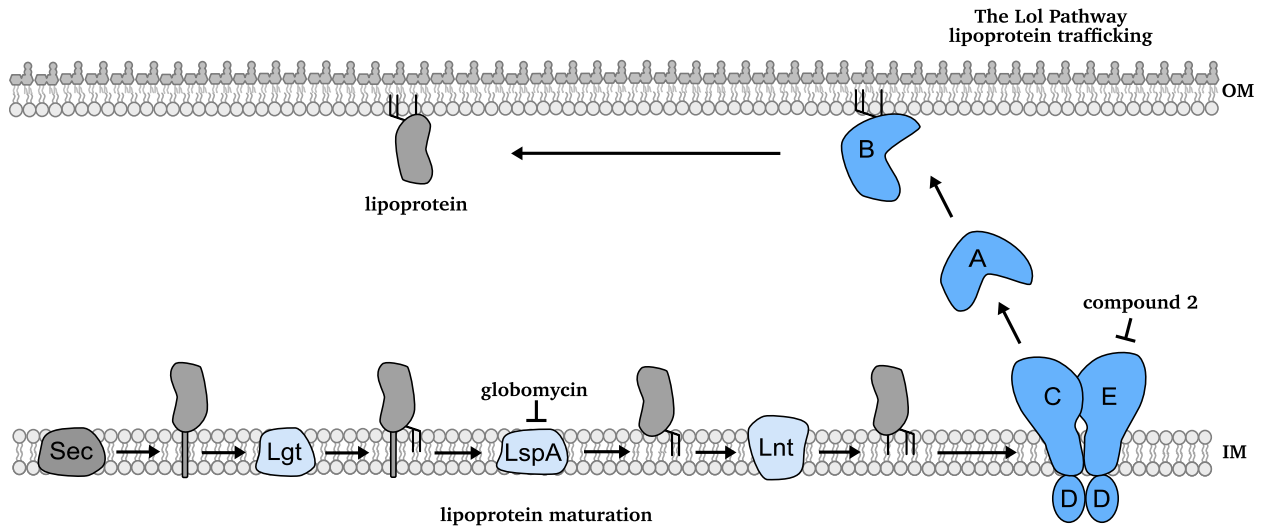

771

772 **Figure 1. Lipoprotein maturation and trafficking and OM lipoprotein biogenesis**

773 **inhibitors.** Lipoproteins exit the cytoplasm via the Sec translocon, where they are

774 tethered by their signal sequence in the inner membrane (IM). Before they are trafficked

775 to the outer membrane (OM), lipoproteins must be modified by a series of lipoprotein

776 maturation enzymes in the IM. Lipoproteins undergo sequential modifications by Lgt,

777 LspA, and Lnt. Modified, triacylated lipoproteins are extracted by LolCDE. LolA receives

778 lipoproteins from LolC, shielding their hydrophobic acyl chains as it traffics them across

779 the aqueous periplasm. At the OM, LolB receives and inserts lipoproteins. Two known

780 compounds inhibit lipoprotein maturation and trafficking: globomycin inhibits LspA, while

781 compound 2 inhibits LolCDE.

782



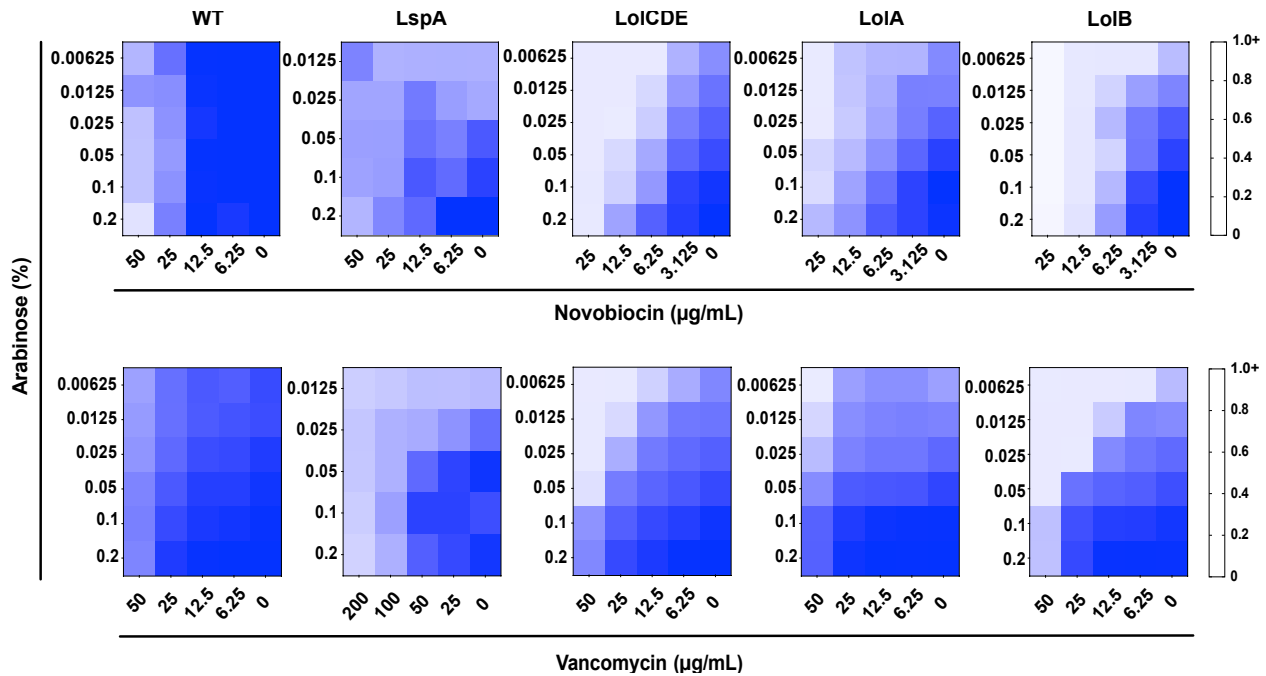

783

784

785 **Figure 2. Depletion of lipoprotein maturation or trafficking factors causes outer**

786 **membrane permeability.** Strains in which LspA, LoICDE, LoIA, or LoIB were under an

787 arabinose-dependent promoter were grown in decreasing concentrations of inducer and

788 increasing concentrations of two large scaffold antibiotics, novobiocin and vancomycin.

789 Depletion of any OM lipoprotein biogenesis factor tested caused increased sensitivity to

790 large scaffold antibiotics. Arabinose did not affect the sensitivity of wildtype (WT) to

791 large scaffold antibiotics. Data are from three independent experiments. Averaged

792 density (A<sub>600nm</sub>) values of antibiotic-treated cultures relative to mock-treated control (set

793 as 1.0) are shown.

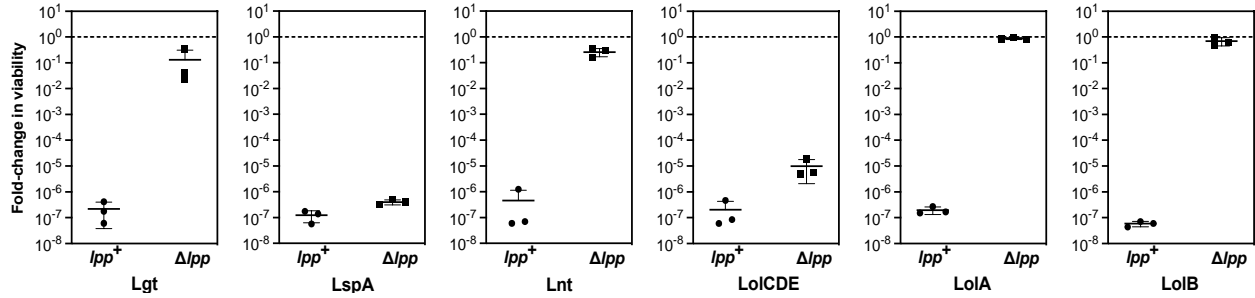

794

795 **Figure 3: Deletion of *lpp* protects against lipoprotein maturation and trafficking**

796 **defects.** Relative viability of strains with arabinose-dependent expression of OM

797 lipoprotein biogenesis proteins (Lgt, LspA, Lnt, LolCDE, LolA, or LolB). Viable counts

798 per mL of culture were enumerated in the presence of 0.2% arabinose or in the absence

799 of arabinose and used to determine the fold change in viability when inducer is absent.

800 For LspA strains, the comparison was made between arabinose replete conditions

801 (0.2%) and arabinose deplete (0.002%) conditions. Data represent three independent

802 experiments and the mean.



803

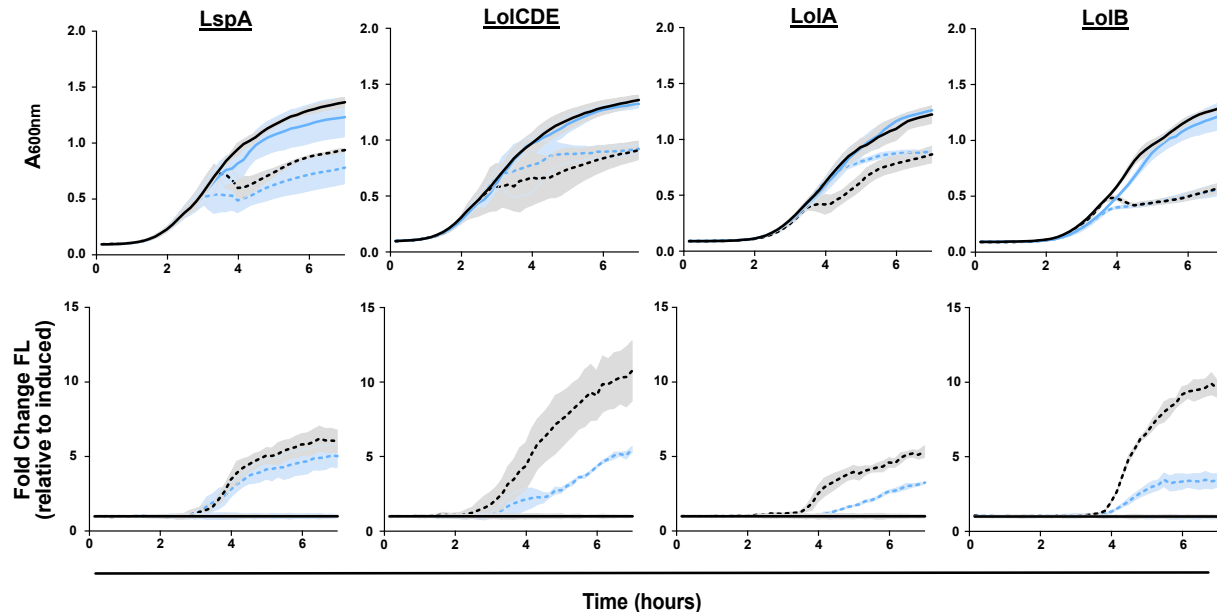

804

805

806 **Figure 4: Depletion of lipoprotein maturation or trafficking causes NlpE-**  
807 **dependent activation of the Cpx stress response.** Strains carrying  $P_{cpxP}$ -*gfp* and  
808 inducible LspA, LoICDE, LoIA, or LoIB were grown with (solid) or without (dots) inducer  
809 (0.2% arabinose). Culture density ( $OD_{600}$ , top) and fluorescence were measured to  
810 calculate fluorescence per cell (Fluorescence/ $OD_{600}$ ). Strains were tested in the  
811 presence (black) or absence (blue) of *nlpE*. (Data are average  $\pm$  standard deviation,  
812 N=3)

813

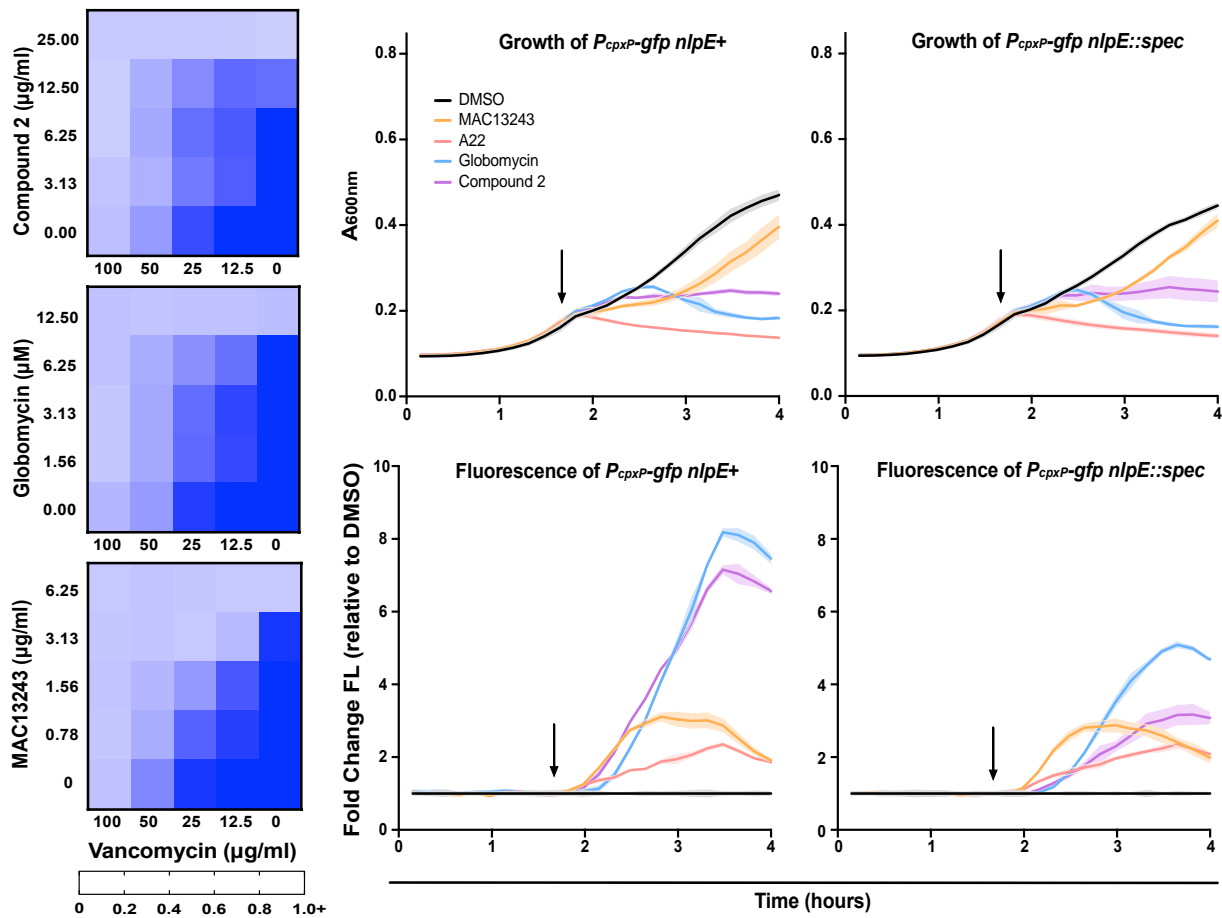

814

815

816 **Figure 5: Chemical inhibitors of lipoprotein maturation or trafficking fit the**

817 **expected profile of OM lipoprotein biogenesis inhibition.** (Left) OM permeability

818 was assessed in efflux defective mutants ( $\Delta toI/C$ ) by treatment with increasing

819 concentrations of vancomycin and compound 2 (top), globomycin (middle), or

820 MAC13243 (bottom). Data are from three independent experiments. Averaged density

821 ( $A_{600nm}$ ) values of antibiotic-treated cultures relative to mock-treated control (set as 1.0)

822 are shown. (Right) Culture density ( $OD_{600}$ , top) and fluorescence were used to calculate

823 fluorescence per cell in  $\Delta toI/C$  strains with native *nlpE* or with a chromosomal deletion of

824 *nlpE* (*nlpE::spec*). Cells were treated after 100 minutes (arrow), with DMSO (black),  
825 MAC13243 (orange), A22 (red), globomycin (blue), or compound 2 (purple). (Data are  
826 average  $\pm$  standard deviation, N=3)

827 **Table 1: Deletion of *lpp* increases resistance to OM lipoprotein biogenesis**  
828 **inhibitors.**

| Strain                                                              | Globomycin ( $\mu\text{M}$ ) | Compound 2 ( $\mu\text{g}/\text{mL}$ ) | A22 ( $\mu\text{g}/\text{mL}$ ) | MAC13243 ( $\mu\text{g}/\text{mL}$ ) |
|---------------------------------------------------------------------|------------------------------|----------------------------------------|---------------------------------|--------------------------------------|
| <i><math>\Delta\text{tolC}</math> lpp+</i>                          | 12.5                         | 10                                     | 2.5                             | 2.5                                  |
| <i><math>\Delta\text{tolC}</math> <math>\Delta\text{lpp}</math></i> | >50                          | >40                                    | 2.5                             | 2.5                                  |

829

830

831

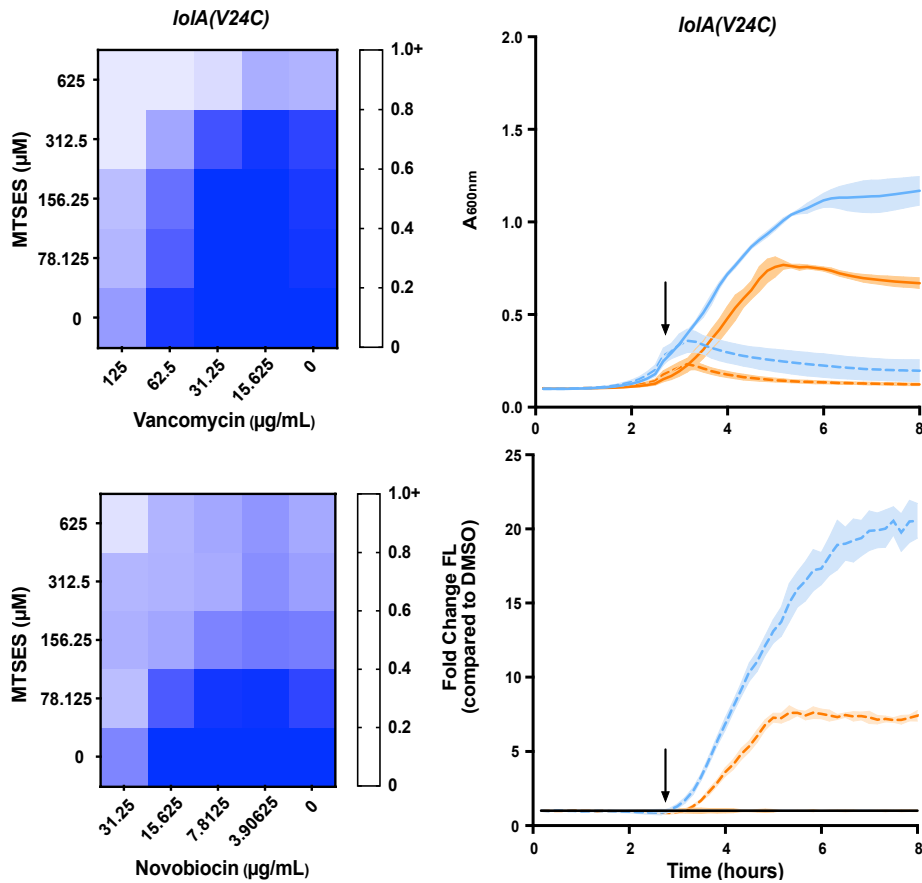

832

833

834 **Figure 6: An allele specific inhibitor of LoIA causes OM permeability and**  
835 **activation of the Cpx stress response. (A)** OM permeability to vancomycin and  
836 novobiocin was assessed in a strain carrying *loIA(V24C)* upon treatment with increasing  
837 concentrations of MTSES. Data are from three independent experiments. Averaged  
838 density ( $A_{600\text{nm}}$ ) values of antibiotic-treated cultures relative to mock-treated control (set  
839 as 1.0) are shown. (B) Growth ( $\text{OD}_{600}$ ) of strains carrying *loIA(V24C)* and a Cpx reporter  
840 plasmid ( $P_{\text{cpxP}}\text{-gfp}$ ) was measured. Strains either had native *nlpE* (blue) or were  
841  $\Delta nlpE::\text{spec}$  (orange). In early log phase (arrow), strains were treated with 0.5 mM  
842 MTSES (dotted) or vehicle control (1% DMSO) (solid). Fluorescence was measured and

843 normalized to OD<sub>600</sub> to calculate fluorescence per cell. Reporter values were normalized  
844 to a DMSO-treated control (data are average ± standard deviation, N=3).  
845

846

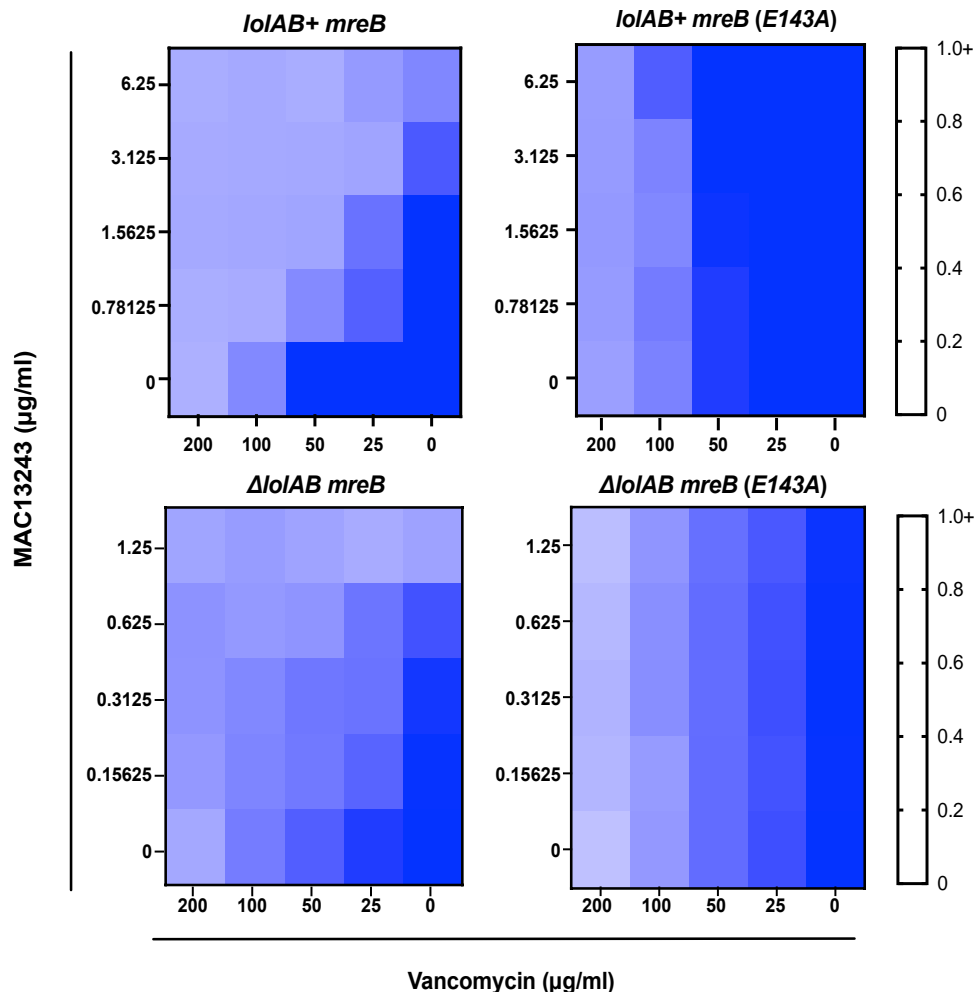

847

848

849 **Figure 7: MAC13243 activity is independent of LolA.** To test MAC13243 activity on  
850 LolA, OM permeability of strains in which chromosomal *lolAB* (*lolAB+*) are present or  
851 absent ( $\Delta lolAB$ ) was assessed. Strains carried either wildtype *mreB* or *mreB(E143A)*  
852 and were assessed upon treatment with increasing concentrations of MAC13243 and  
853 vancomycin. Data are from three independent experiments. Averaged density ( $A_{600nm}$ )  
854 values of antibiotic-treated cultures relative to mock-treated control (set as 1.0) are  
855 shown.

856

857 **Supplemental Figure Legends:**

858

859 **Figure S1: Depletion of lipoprotein maturation or trafficking factors causes outer**  
860 **membrane permeability.** Strains in which the only copy of LspA, LolCDE, LolA, or LolB  
861 was under an arabinose inducible promoter were grown with increasing concentrations  
862 of inducer and the large scaffold antibiotics rifampicin and erythromycin. Depletion  
863 increased OM permeability, as measured by sensitivity to large scaffold antibiotics. Data  
864 are from three independent experiments; averaged density ( $A_{600nm}$ ) values of antibiotic-  
865 treated cultures relative to mock-treated control (set as 1.0) are shown.

866

867 **Figure S2: Deletion of *lpp* does not protect against general OM biogenesis**  
868 **defects.** Relative viability of strains with arabinose-dependent expression of *bamD* or  
869 *lptE*. Viable counts per mL of culture were enumerated in the presence of 0.2%  
870 arabinose or in the absence of arabinose and used to determine the fold change in  
871 viability when inducer is absent. Data represent three independent experiments and the  
872 mean.

873

874 **Figure S3: Depletion of lipoprotein maturation or trafficking activates the Rcs**  
875 **stress response but does not activate general OM stress responses.** Inducible  
876 LspA, LolCDE, LolA, or LolB strains carrying  $P_{osmB}$ -*gfp*,  $P_{micA}$ -*gfp*, or  $P_{rpoD}$ -*gfp* were grown  
877 with (black solid) or without (blue dots) inducer. Culture density ( $OD_{600}$ ) and  
878 fluorescence were measured to calculate fluorescence per cell (Fluorescence/ $OD_{600}$ ).  
879 (Data are average  $\pm$  standard deviation, N=3).



880 **Figure S4: Chemical inhibitors of OM lipoprotein biogenesis cause Rcs activation**  
881 **but do not activate  $\sigma^E$  or RpoD.** Stress response activation after treatment (arrow) with  
882 DMSO (black), MAC13243 (orange), A22 (red), globomycin (blue), or compound 2  
883 (purple) was assessed in a  $\Delta tolC$  background. Culture density ( $OD_{600}$ , top) and  
884 fluorescence were used to calculate fluorescence per cell ( $OD_{600}/\text{Fluorescence}$ ) in  
885 strains carrying  $P_{osmB}$ -*gfp*,  $P_{micA}$ -*gfp*, or  $P_{rpoD}$ -*gfp*. (Data are average  $\pm$  standard deviation,  
886 N=3).

887

888 **Figure S5: MTSES inhibits the activity of LolA(V24C) and resistance to MTSES**  
889 **increases in the absence of Lpp.** A) Growth ( $OD_{600}$ ) of strains carrying either *lolA*<sup>+</sup>  
890 (black) or *lolA(V24C)* (blue) was measured upon treatment with MTSES. In early log  
891 phase (arrow), strains were treated with 0.5 mM MTSES (dotted) or vehicle control (1%  
892 DMSO) (solid). (Data are average  $\pm$  standard deviation, N=3). B) MICs of strains  
893 carrying either *lolA*<sup>+</sup> or *lolA(V24C)* were assessed in the presence (*lpp*<sup>+</sup>) and absence  
894 ( $\Delta lpp$ ) of Lpp (N=3).

895

896 **Figure S6: An allele specific inhibitor of LolA causes OM permeability to**  
897 **antibiotics.** OM permeability to vancomycin, novobiocin, rifampicin, and erythromycin  
898 was assessed in *lolA*<sup>+</sup> strains upon treatment with increasing amounts of MTSES (top).  
899 OM permeability to rifampicin and erythromycin were also assessed in a strain carrying  
900 *lolA(V24C)* upon increasing concentrations of MTSES (bottom). Data are from three  
901 independent experiments; averaged density ( $A_{600nm}$ ) values of antibiotic-treated cultures  
902 relative to mock-treated control (set as 1.0) are shown.

903 **Figure S7: MTSES treatment activates the Cpx stress response.** Cpx activation  
904 upon treatment with MTSES was assessed in a *lolA*<sup>+</sup> background. Growth (OD<sub>600</sub>) of the  
905 *lolA*<sup>+</sup> strains carrying a Cpx reporter plasmid (*P*<sub>CpxP</sub>-*gfp*) was measured. Strains were  
906 either *nlpE*<sup>+</sup> (blue) or *nlpE::spec* (orange). In early log phase (arrow), strains were  
907 treated with DMSO (1%) (solid) or 0.5 mM MTSES (dotted). Fluorescence per cell was  
908 calculated using fluorescence normalized to OD<sub>600</sub>. Reported values are normalized to a  
909 DMSO-treated control (Data are average ± standard deviation, N=3).

910

911 **Figure S8: MTSES treatment causes activation of the Rcs stress response.** Cpx  
912 activation upon treatment with MTSES was assessed in *lolA*<sup>+</sup> (blue) and *lolA(V24C)*  
913 (orange) strains carrying *P*<sub>osmB</sub>-*gfp*, *P*<sub>micA</sub>-*gfp*, or *P*<sub>rpoD</sub>-*gfp*. Growth (OD<sub>600</sub>) and  
914 fluorescence were measured after treatment with DMSO (1%) (solid) or 0.5 mM MTSES  
915 (dotted) in early log phase. Fluorescence per cell was calculated by normalizing  
916 fluorescence to OD<sub>600</sub>. Reported fluorescence values are normalized to a DMSO-  
917 treated control (Data are average ± standard deviation, N=3).

918
